# Supplementary material
Source: PubMed Central journal article supplement (PMC3070589)
Supplement: mmc1.pdf [file mmc1.pdf]

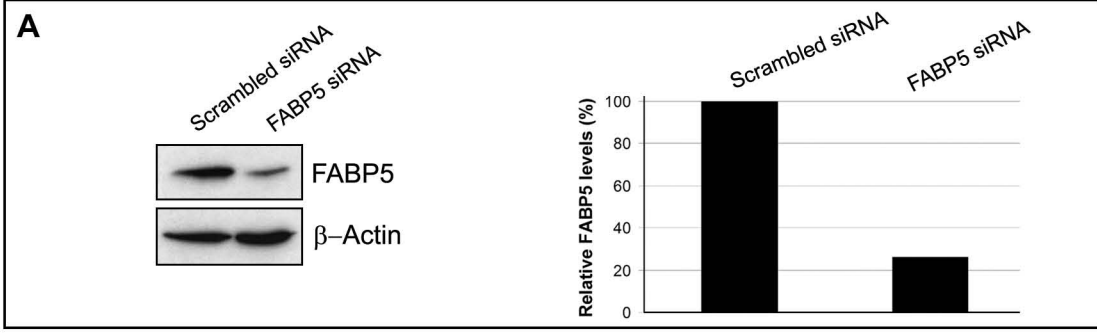

Hs578T scrambled siRNA

Hs578T FABP5 siRNA

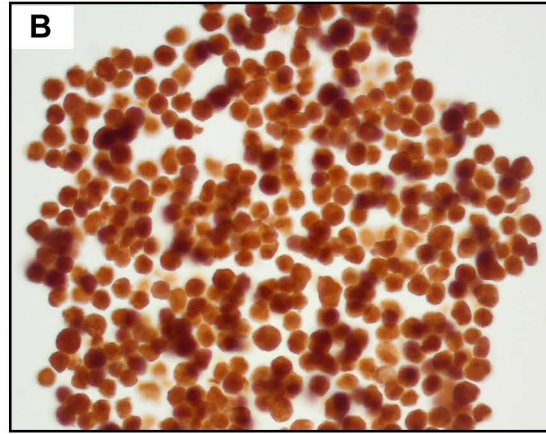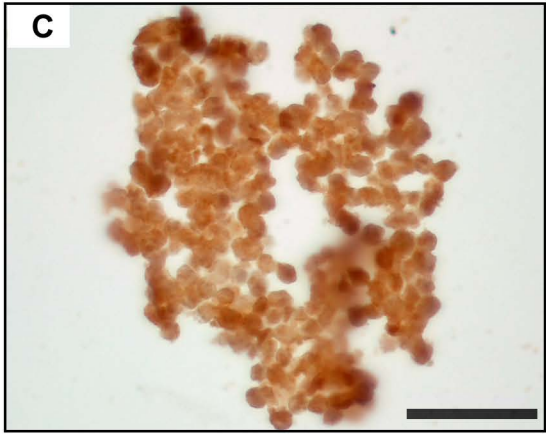

BT20

Hs578T

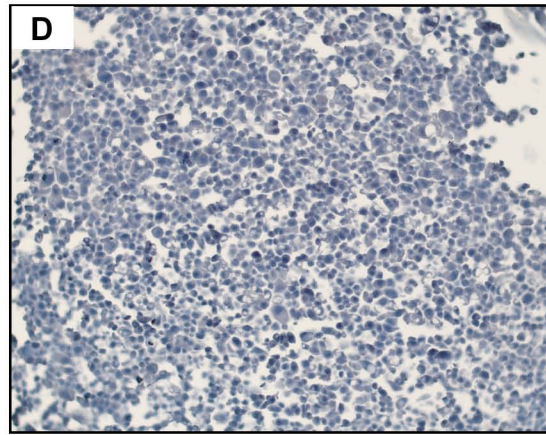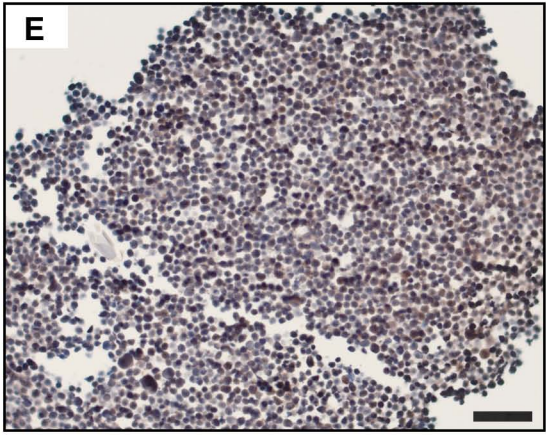

**Supplemental Figure 1.** Validation of the anti-FABP5 antibody used for immunohistochemical analysis. (A) The FABP5-positive Hs578T breast cancer cell line was transfected with scrambled (control) siRNA or FABP5 siRNA. Cells were harvested 60 hrs after transfection and FABP5 protein levels analysed by Western blotting and densitometric scanning. As shown on the right, FABP5 levels were reduced by ~75%. (B,C) Hs578T cells transfected with scrambled or FABP5 siRNAs, paraffin-embedded and immunostained with anti-FABP5 antibody. The intensity of the FABP5 signal was significantly reduced in FABP5 siRNA-transfected cells. (D,E) Immunostaining of BT20 (low or absent FABP5 RNA) and Hs578T (high levels of FABP5 RNA) using anti-FABP5 antibody. Scale bars: 100  $\mu$ m.
